# Supplementary material for: A view through a chromatin loop: insights into the ecdysone activation of early genes in Drosophila
Source: PubMed Central journal article supplement — Nucleic Acids Res. 2014 Aug 20;42(16):10409–24. doi: 10.1093/nar/gku754 (PMC4176353; doi:10.1093/nar/gku754), 2014-08-20
Supplement: supp_gku754_nar-01449-x-2014-File012.pdf [file supp_gku754_nar-01449-x-2014-File012.pdf]

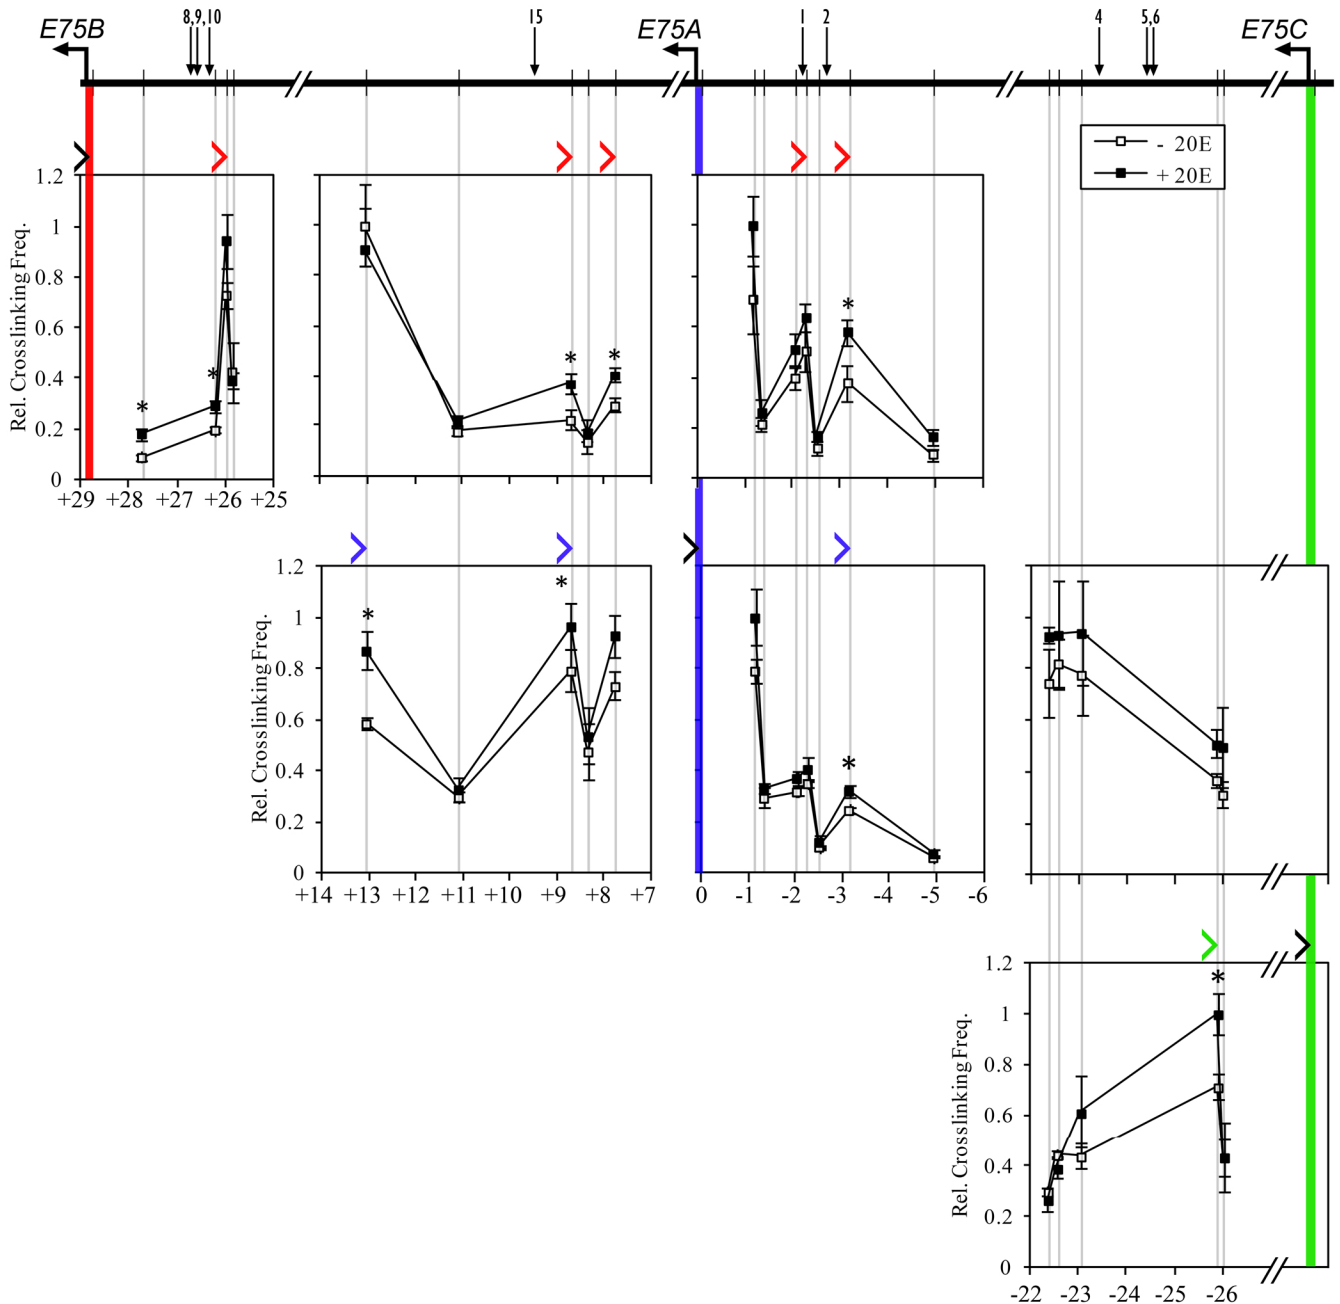

**Figure S1. High resolution 3C interaction profiles at the *E75* gene.** Schematic of the *E75* locus is shown at the top, with horizontal arrows indicating transcription start sites, vertical bars indicating DpnII sites and numbered arrows indicating EcREs. Crosslinking frequencies (y axis) between the fixed DpnII anchor for *E75B* (upper panels), *E75A* (middle panels) or *E75C* (lower panel) and several EcRE-containing regions were measured in S2 cells in the absence or presence of ecdysone as indicated. Location of fixed anchor sites are marked by red (*E75B*), blue (*E75A*), and green (*E75C*) bars, and test sites are marked by gray bars. Black angle brackets (">") above each interaction profile indicate the location and direction of anchor primers. Color-coded angle brackets indicate the location and direction of test primers in fragments that interact with the *E75B* (blue), *E75A* (red), and *E75C* (green) promoters, either in the presence or absence of ecdysone. Coordinates are given along the x axis relative to the *E75A* transcription start site. Asterisk indicates significant difference between ecdysone and control samples (Paired Student's *t*-test,  $P < 0.05$ ). Mean  $\pm$  S.E.M. is shown from three independent experiments.

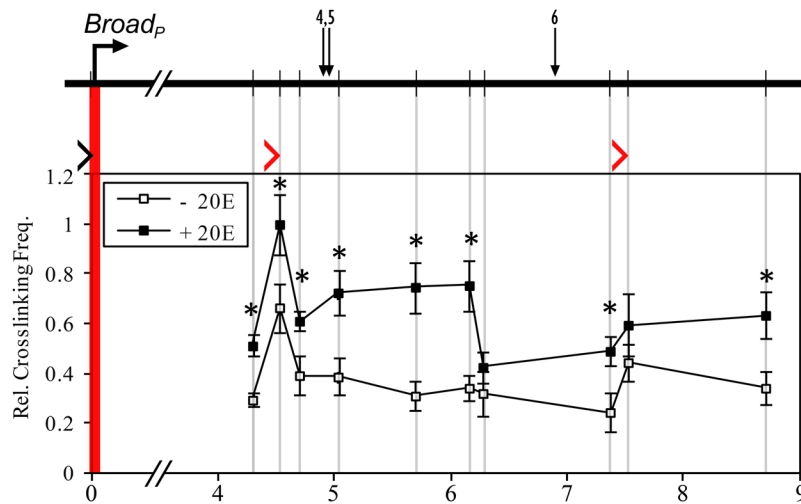

**Figure S2. High resolution 3C interaction profile at the *Broad* locus.** Schematic is shown for the region 0 to 9 kilobases downstream from the proximal promoter, indicated by a horizontal arrow. Vertical bars indicate DpnII sites and numbered arrows indicate EcREs. Crosslinking frequencies (y axis) between the fixed DpnII anchor and the downstream EcRE-containing region were measured in S2 cells in the absence or presence of ecdysone as indicated. Locations of fixed anchor site and test sites are marked by red and gray bars, respectively. Black angle bracket (" $>$ ") indicates the location and direction of the anchor primer. Red angle brackets indicate the location and direction of test primers in fragments that interact with the *Broad* promoter, either in the presence or absence of ecdysone. Coordinates are given along the x axis relative to the proximal transcription start site. Asterisk indicates significant difference between ecdysone and control samples (Paired Student's *t*-test,  $P < 0.05$ ). Mean  $\pm$  S.E.M. is shown from three independent experiments.

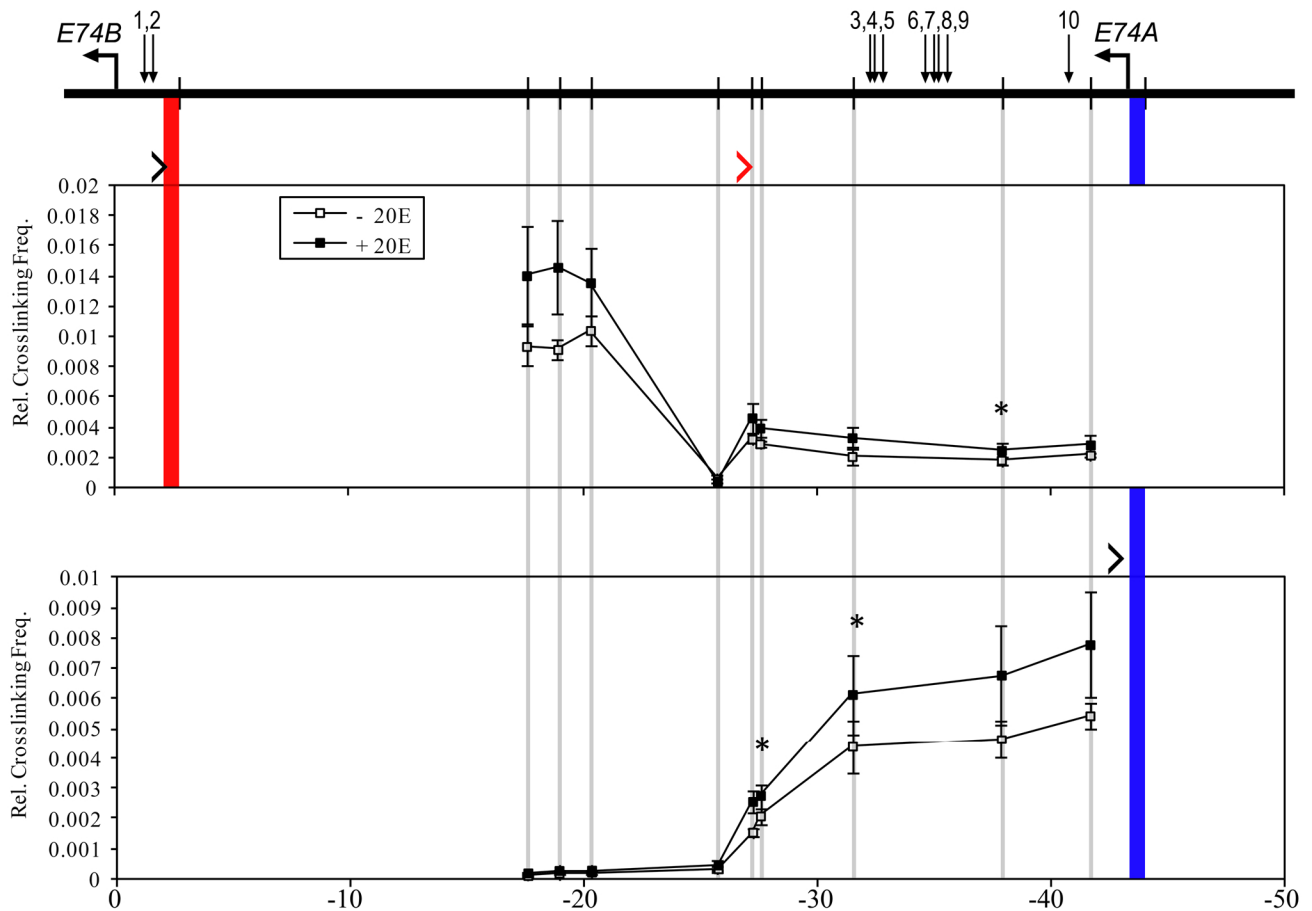

**Figure S3. Long-distance 3C interactions at the *E74* locus.** Schematic of *E74* is shown at the top. Horizontal arrows indicate transcription start sites, vertical bars indicate HindIII sites, and numbered arrows designate EcREs. Crosslinking frequencies (y axis) between the fixed HindIII anchor for *E74B* (upper panel) or *E74A* (middle panel) and the rest of the locus were measured in S2 cells in the absence or presence of ecdysone as indicated. Location of fixed anchor sites are marked by red (*E74B*) or blue (*E74A*) bars, and test sites are marked by gray bars. Black angle brackets (" $>$ ") indicate the location and direction of anchor primers. The red angle bracket indicates the location and direction of the test primers in a fragment that interacts with the *E74B* promoter. Coordinates are given along the x axis relative to the *E74B* transcription start site. Asterisk indicates significant difference between ecdysone and control samples (Paired Student's *t*-test,  $P < 0.05$ ). Mean  $\pm$  S.E.M. is shown from three independent experiments.

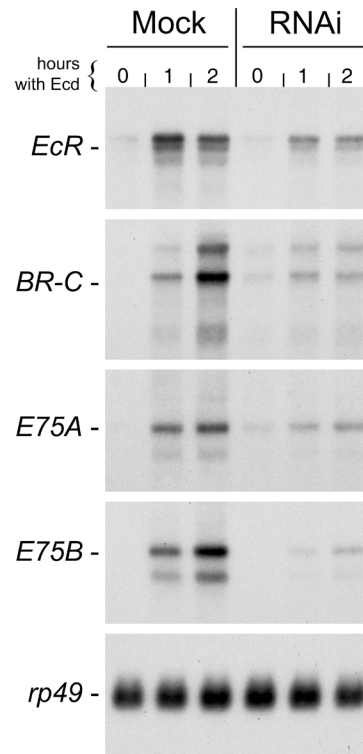

**Figure S4. Knockdown of *EcR* transcript by RNAi.** S2 cells were transfected with dsRNA targeting *EcR* or with mock dsRNA as indicated. After 3 days of incubation, cells were treated with  $1 \times 10^{-6}$  M ecdysone for 0, 1, or 2 h. Cells were collected, and total RNA was purified for Northern blot hybridization. Probes are designated on the left. The *EcR* panel confirms reduction of *EcR* transcripts. Panels *BR-C*, *E75A*, and *E75B* demonstrate that reduction of *EcR* by RNAi substantially disrupts ecdysone-induced activation of the early genes. The bottom panel shows the *rp49* loading control.

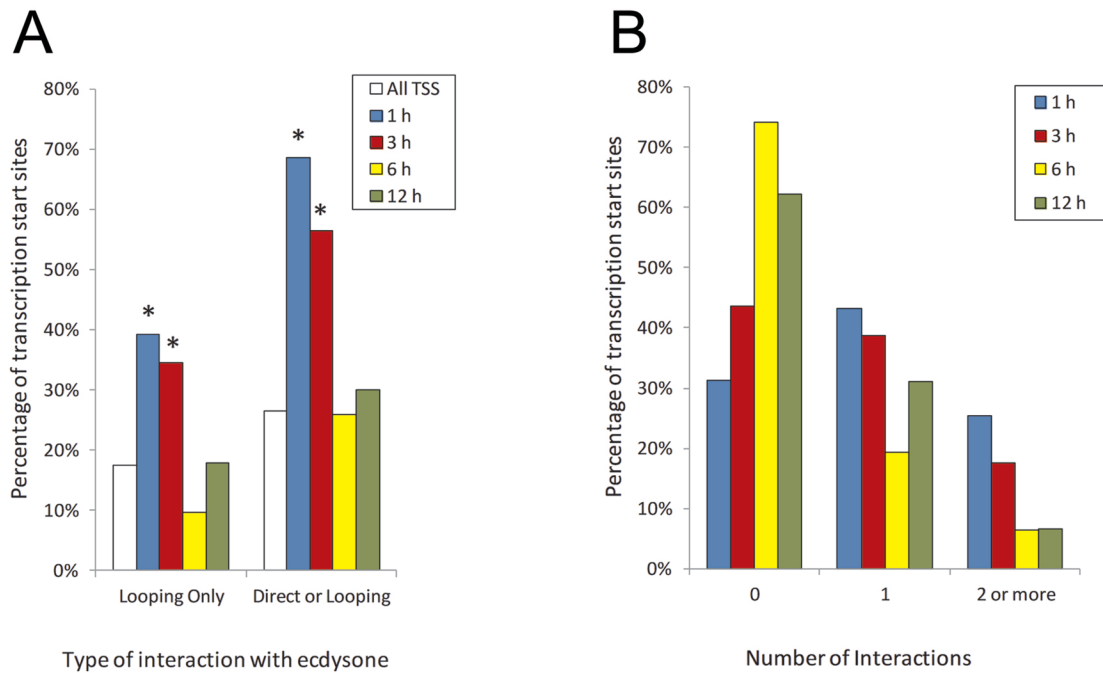

**Figure S5. Promoter-EcRE interactions correspond to rapid ecdysone response.** (A) Publicly available data in Kc167 cells describing the genome-wide distribution of ecdysone receptor binding sites (GEO accession GSE9156), ecdysone-responsive transcripts (accession GSE11625), and the genome-wide interactome (accession GSE38468) was used to identify direct and looping interactions as indicated between the ecdysone receptor and all transcription start sites as well as transcription start sites from genes activated by ecdysone after 1, 3, 6, or 12 h. The percentage of interacting transcription start sites from each category is shown on the y axis. Asterisk (\*) indicates significantly greater frequency of interaction compared to all transcription start sites (Fisher's exact test,  $P < 0.05$ ). (B) Same as in (A), except TSS are categorized by the number of EcRE interactions.

**Table S1.** Chromatin immunoprecipitation amplicon coordinates and primer sequences

| Gene                                        | Candidate EcRE(s)            | Coordinates <sup>a</sup> | Amplicon                                          | Primer Sequences (5'-3')                      |
|---------------------------------------------|------------------------------|--------------------------|---------------------------------------------------|-----------------------------------------------|
| E75                                         | +26726/26714, +26626/26614   | +26752/+26616            | TGTGCGATTTTGTAGCTCTG<br>ATTTCCTTGAACGCATTTTCG     |                                               |
|                                             | +26385/26373                 | +26416/+26291            | CTCCGCTTCTCTCTCAGC<br>AGAGCAGGCTATGGGTATGG        |                                               |
|                                             | +19778/19766, +19768/19756   | +19813/+19694            | GACATGTGCCTCGATGTGAG<br>CATGCTCGTTGACTTCGTTG      |                                               |
|                                             | +17808/17796                 | +17880/+17736            | TTTTCCATCGCTGTTTGTGTC<br>AGTCGCATGAAAAGCAAAGG     |                                               |
|                                             | +17477/17465                 | +17551/+17429            | ACACACACCAAGCACTCAC<br>TTCACITGAGAGGCGAAGAC       |                                               |
|                                             | +16475/16463                 | +16599/+16438            | TTCAGTTCGGTTAGGCTTGG<br>CGCAGCACGTACCTTGTTAG      |                                               |
|                                             | -                            | +15055/+14878            | CGCACTTACGCACAATTTTC<br>TGCCCATTTATATCGACTACACATC |                                               |
|                                             | +12788/12776                 | +12809/+12690            | AACTCGTTGCGTTTGTGTC<br>TTTCTCCGCTGCAATCTAGC       |                                               |
|                                             | +10099/10087                 | +10125/+9990             | GCAGTCAGTCGTTCAAGTGC<br>AAGGAAAAGCCAGGGAAGAAAC    |                                               |
|                                             | +9389/9377                   | +9427/9278               | GCGTACGCTGCTTCTGTTTC<br>TCGGCAGTTGTTGTGTATGC      |                                               |
|                                             | +7601/7589, +7592/7580       | +7698/+7562              | CAAATACAAGGACCGCCAAG<br>CAAGCGAGTCGGGTTAATG       |                                               |
|                                             | +7349/7337                   | +7393/+7253              | AACGATCGCTGGACTCTGTC<br>TTGTGCAGTGTTCCTTGG        |                                               |
|                                             | +5575/5563, +5552/5540       | +5685/+5540              | CGATCACGATCATGAGCAAC<br>AAGTGCAACGATCTGCAGTG      |                                               |
|                                             | +1796/1784                   | +1819/+1675              | GGACTTGAACCGTTGCTC<br>TAACCTCAGCACTCGCCATC        |                                               |
| Broad                                       | -50025/-50037                | -49935/-50104            | AGCCGCAGAAATCTGAAAAC<br>CTCGAATCTCGATCCCAAAG      |                                               |
|                                             | -46108/-46120, -45973/-45985 | -45909/-46147            | ATTTGTGTGCGCTGTGTTG<br>GCAGCAGGCTTTTATAATTTTC     |                                               |
|                                             | -35135/-35147                | -35041/-35205            | TTCACGCAGTCTCTCGAATG<br>GGGCTTTTGTGTTGGATTTCAG    |                                               |
|                                             | -34375/-34387                | -34280/-34419            | CGGACAAGTATTCTTCGATGC<br>GCCGTATGGAAAAGAGTTTCG    |                                               |
|                                             | -33932/-33944                | -33910/-34081            | CTTCATACCCACACCTTGC<br>GTTTCGCTCGAGTCGTTGG        |                                               |
|                                             | -28807/-28819                | -28748/-28912            | ACCAGGCAGAGCACTACCAC<br>CCCAGTAGTGGGATGTTGTTG     |                                               |
|                                             | -25989/-26001                | -25956/-26030            | CGGGTAGCATCTTTCTCAGC<br>GCAAAGACGGAAATGGGTAG      |                                               |
|                                             | -20870/-20882                | -20770/-20906            | AACTTTGTGTAGTGCGCCATC<br>ATTTTCAGCTGCTGCTACCG     |                                               |
|                                             | -                            | -18691/-18858            | GGGATAGTCGCTGCCAATAC<br>TAGTTCGTTGCCGCTGTTC       |                                               |
|                                             | -316/-328                    | -276/-424                | CAGGCAGCGCTGAAACTG<br>ACTTCTCGTGTGCGATTGTG        |                                               |
|                                             | +4905/+4893, +4923/+4911     | +4839/+5003              | GCTCTCTCTCGTGGTTGC<br>CGCACGCTGCAATGTATTAG        |                                               |
|                                             | +6984/+6972                  | +6918/+7062              | CGTATGGATTGAAGCTTTTCG<br>TCGCTCTTTTCGCTTAGTTG     |                                               |
|                                             | E74                          | -1773/-1785              | -1662/-1807                                       | GCAGGCAGAAGAAGGAGAAG<br>TGTGAGTGCACCCCTAGTTG  |
|                                             |                              | -2392/-2404              | -2311/-2430                                       | ACAGCTCCTTGACTCCTTCG<br>ACCAGTGTGCAGCATTGTGTC |
| -7601/-7613                                 |                              | -7563/-7680              | TCGTTGTCTCGCTCAGTGTG<br>GGCGGACTCACAAATAGGTTG     |                                               |
| -                                           |                              | -11661/-11771            | AATTTGCGAGGAAGGAGAAC<br>TTCGCAGATTGCAGTTCG        |                                               |
| -16753/-16765                               |                              | -16660/-16805            | AGAGGGGGCTTTCAGAGTTG<br>AGCCAGCAAACGAACTGAAC      |                                               |
| -23394/-23406                               |                              | -23354/-23499            | TTTCGGTTTTCGCGATTGTG<br>AAATTTGTGCCGACGTC         |                                               |
| -31543/-31555                               |                              | -31505/-31619            | ATTGAAAATTCGCGTCGTTG<br>GCGCTAGTTGTTGTTGTTG       |                                               |
| -31560/-31572, -31754/-31766                |                              | -31705/-31807            | AGCGCCACAACACTCACTTAC<br>TCTGGTCTGTGAACTCTGC      |                                               |
| -32549/-32561, -32589/-32601                |                              | -32516/-32633            | CACCGTTTGCATTCACTCAC<br>AGTTCAGCGTGTGTTGTGCTG     |                                               |
| -35044/-35056, -35237/-35249, -35255/-35267 |                              | -35034/-35277            | TGATTGTTTGGGGTAATTGAAC<br>TGGTTATCGAAGGTCTTTCACC  |                                               |
| -35533/-35545                               |                              | -35502/-35646            | TGAGAGCCTGCTAAGAGCTG<br>TTTGATGTGTGTGCGTATG       |                                               |
| -40447/-40459                               |                              | -40410/-40513            | GTAGTGCCCGTTATCGGAAG<br>GATCGTCGGAGAGGAGAGTG      |                                               |

<sup>a</sup> Shown relative to the *E75A*, *Broad proximal*, and *E74B* transcription start sites.

**Table S2.** 3C HindIII coordinates and primer sequences

| Gene                 | HindIII Coordinates <sup>a</sup> | Primer Sequences (5'-3')  |
|----------------------|----------------------------------|---------------------------|
| E75                  | +31166 (E75B Anchor)             | GTGTGAGGCAATGGGAATG       |
|                      | +23422                           | TCTTTTCGTGCTAAAACATTTATGG |
|                      | +22199                           | CAACCATGGTATCCCAAATTC     |
|                      | +18295                           | AACGGAAATATTGTGGGCTAAAC   |
|                      | +15868                           | CAGCAGGCAAGCCGTATC        |
|                      | +13767                           | AAGTAGCCTTCCAAACGGTTC     |
|                      | +230 (E75A Anchor)               | TGTGAAGAAAACATGTAAACTTGG  |
|                      | -2587                            | TTTACCTTACCCCTGCGATG      |
|                      | -4448                            | GCAAAAATTCTGACGACCTTG     |
|                      | -6847                            | GCGAATTCGGTGTGTAGC        |
|                      | -11550                           | GCCACCTAAGGCTAAAATTTCC    |
|                      | -11845                           | CGGCGATAAGATCGAAATTG      |
|                      | -14536                           | CGAGAAGCAAGTTCAAATTAC     |
|                      | -17646                           | AGTGATCGCAATACCCCTTGC     |
|                      | -20249                           | GAGTTGCTGAACCGTCCAC       |
|                      | -22134                           | TTCTACTTTCAGGTAAGTCAACTGC |
|                      | -26700                           | AGTGGCACTGAGATTCAAACC     |
|                      | -29646                           | AATCCTGATAAGCAAAGAAGAACG  |
|                      | -31306                           | GCACAGTTGTGACCTAATGACC    |
|                      | -33336                           | TGTCTAATGCAACTGGAAAATTG   |
| -33446               | TTTCGTGCGGAACTTTAG               |                           |
| -39360               | TTCGTTGTGAATTTTTTCAGAGTC         |                           |
| -42318               | GGTCACAATTCTCTCCTTTACAGTG        |                           |
| -58321 (E75C Anchor) | GACATCTGTAGCTTAGTGTAAGAAGTGG     |                           |
| Broad                | +7479                            | AAAGGCGAAGAGCGAGAAC       |
|                      | +6930                            | ACACAGCCCACTCACGTTC       |
|                      | +2667 (Broad Anchor)             | ATTGTTGCTGCCACAGATTG      |
|                      | -7706                            | AGTAGGTGGAGCAACCAATTTTC   |
|                      | -8667                            | CAACGAGTGAGTAGGGCAGAG     |
|                      | -19008                           | TTACTATCGGTGGCATTCTCG     |
|                      | -22874                           | CATCAGCTGCGGTGGAG         |
|                      | -31124                           | ACGAGGTTGAGAACGGGAATG     |
|                      | -33572                           | GCTCTCCGATCCACACTTTC      |
|                      | -52023                           | TGCCCTCTACAACGACTGG       |
| E74                  | -2283 (E74B Anchor)              | TGAAGAGGAAGCGCATTAGG      |
|                      | -17573                           | TGATGAGCAGCAATGAATAACA    |
|                      | -18908                           | AATGCTGTGCATGCTTAAAGG     |
|                      | -20303                           | TTGTTAAATCAAAAACATTCCTTC  |
|                      | -25727                           | AGTGAGCGGTACTCAGTGCTC     |
|                      | -27206                           | TTTACATTTCCCGAACACC       |
|                      | -27540                           | TCTCACACTGTCATGGCTACG     |
|                      | -31481                           | CGAAAATATGGAGGAGCAAAAC    |
|                      | -37862                           | TGAAGCCGATTTTGATTTCC      |
|                      | -41662                           | CGTTTCGCACATTTTCTTTG      |
| -43162 (E74A Anchor) | GCGGAACTCATTAGCAAG               |                           |

<sup>a</sup> Shown relative to the *E75A*, *Broad proximal*, and *E74B* transcription start sites.

**Table S3. 3C DpnII coordinates and primer sequences**

| Gene   | DpnII Coordinates <sup>a</sup> | Primer Sequences (5'-3')  |
|--------|--------------------------------|---------------------------|
| E75    | +27902 (E75B Anchor)           | GCGACACTCTGATTTCTCAGG     |
|        | +26208                         | AAGCGAGTATGACAGGCCTAAG    |
|        | +25975                         | TGTTCTCCCTGACGTGCTC       |
|        | +25975                         | TGAAACCGCCTACCTGTTG       |
|        | +25856                         | TGTTTCGGTTCTTTGTTTTGC     |
|        | +13061                         | CAACATCTAGACCTGCCACTTG    |
|        | +11101                         | AGATGGCGCCAGTATGTTATG     |
|        | +8710                          | GGAACATTTTCGAGCATAACTCAC  |
|        | +8347                          | CAATAGACAAGACGAAGGTCCAC   |
|        | +7772                          | CAATTTTCTACCAGCCTTGAC     |
|        | -132 (E75A Anchor)             | CTTTGCACTCTCTCGCACTTC     |
|        | -1148                          | GACAAATGCGTCTAACACAAAGTG  |
|        | -1337                          | CCGGTACCCTTGAATCAAATC     |
|        | -2032                          | TCTGCCAATTTCCCAATGAG      |
|        | -2265                          | CCTGGCTGGCTGTTACTTAGTC    |
|        | -2394                          | GCAAAACTCGCCTTCAACTC      |
|        | -2505                          | GTTGAAGGCTTCCGTGCTAC      |
|        | -3138                          | TTCATGATGTCATGGCGAAG      |
|        | -4927                          | CCAGCACTAACTCGAATTTTCC    |
|        | -22360                         | CAAGATATCGCTAGCATCCAAAG   |
| -22557 | GCACAGCAGCAACGACTG             |                           |
| -23041 | GCCTTACGCCCTTGACATAC           |                           |
| -25880 | TCCAATCAAACGTTCCGGTATC         |                           |
| -26011 | CAGATGTGGTATTACCAGTCTTTC       |                           |
|        | -60206 (E75C Anchor)           | TGGAAAGTTGCGTTTGTGTTG     |
| Broad  | -6 (Broad Anchor)              | TGATTCAATTGGGCAGACG       |
|        | +4294                          | ACTGTGATGGTAAGCGACCTAAC   |
|        | +4526                          | GCATTGACATTCGGTATCCAC     |
|        | +4697                          | GGAAATTCGCACACACGAG       |
|        | +5029                          | GCAGAGAGCAGCTTTTGTATG     |
|        | +5694                          | GCAGTTTACTTAGCCTCCCTCTC   |
|        | +6157                          | GCTTGCCAAGTTCAAAGACC      |
|        | +6275                          | ATCCGTGGAGGGATAGGAAC      |
|        | +7369                          | GCGAGACAAAAGTGGTGAGG      |
|        | +7524                          | TTCTAACGCTCTCTCGCTCTG     |
| +8706  | GGTGGTGCAGCAGATATGG            |                           |
| E74    | -768 (E74B Anchor)             | GCATGCGAGAAATATGTTTAATTG  |
|        | -845                           | TTACCACATTTTCCCCGATG      |
|        | -1072                          | TTCTCCGCGATTCTCTGG        |
|        | -2123                          | AGTAACAAAGGAAAGGGTTTGC    |
|        | -2734                          | TTAGGATTACTTTTAGCGCACAAAC |
|        | -2771                          | TAGCATTCGACGAGGGAAG       |
|        | -29477                         | CCGAGAGCTGTCGTCTGATAC     |
|        | -30448                         | ACACACGGACATTCTGCAAG      |
|        | -31913                         | AAGTGCCCGTTATCACATGG      |
|        | -32549                         | CACCGTTGCATTTCATTCAC      |
|        | -32979                         | AGCAAATGCAAATGCTTAGAAC    |
|        | -33590                         | AACTGCCGATTGGTGGTG        |
|        | -33798                         | AAGGCTAAAGTTCAATGGAAACC   |
|        | -34183                         | TTCCAAAGGGAAAAGTGCATC     |
|        | -35948                         | CGGCGAAGGACAATCAAC        |
|        | -36559                         | AGAATCGCCCACGTAATCTG      |
| -36795 | GAATGTACGCGACGTCAATG           |                           |
| -38017 | CGAACCAAATGCACTGAATG           |                           |
|        | -43257 (E74A Anchor)           | ACCTGTCTGCAAGCTCACC       |

<sup>a</sup> Shown relative to the *E75A*, *Broad proximal*, and *E74B* transcription start sites.



**Table S4.** Transcript induction by ecdysone

| Early gene transcript | Hour of Peak Expression | Fold induction at Peak |
|-----------------------|-------------------------|------------------------|
| E75A                  | 1                       | 13.8                   |
| E75B                  | 4                       | 89.0                   |
| E75C                  | 2                       | 29.3                   |
| E74A                  | <sup>a</sup>            | 20.3                   |
| E74B                  | 2                       | 9.7                    |
| Broad                 | 2                       | 21.3                   |
| hsp27                 | <sup>a</sup>            | 3.7                    |

<sup>a</sup>. Expression does not peak within four hours.

**Table S5. Summary of 3C interactions**

| Promoter              | No. of interacting<br>EcREs |
|-----------------------|-----------------------------|
| E75B                  | 8                           |
| E75A                  | 4                           |
| E75C                  | 4                           |
| E74B                  | 6                           |
| E74A                  | 4                           |
| Broad <sub>prox</sub> | 5                           |

| Table S6. TSS of early (1, 3 h) and late (6, 12 h) ecdysone-inducible genes in Kc167 cells |             |             |             |             |             |             |             |
|--------------------------------------------------------------------------------------------|-------------|-------------|-------------|-------------|-------------|-------------|-------------|
| 1 h                                                                                        |             | 3 h         |             | 6 h         |             | 12 h        |             |
| Gene ID                                                                                    | TSS         | Gene ID     | TSS         | Gene ID     | TSS         | Gene ID     | TSS         |
| FBgn0000210                                                                                | X:1469165   | FBgn0000250 | 2L:16325444 | FBgn0000454 | 3R:9608012  | FBgn0000045 | 3L:21978310 |
| FBgn0000210                                                                                | X:1469182   | FBgn0000250 | 2L:16325656 | FBgn0000454 | 3R:9608362  | FBgn0000071 | 3R:2588315  |
| FBgn0000210                                                                                | X:1502902   | FBgn0000250 | 2L:16326102 | FBgn0001224 | 3L:9374982  | FBgn0000071 | 3R:2589128  |
| FBgn0000210                                                                                | X:1504545   | FBgn0000448 | 2R:6098853  | FBgn0001225 | 3L:9370476  | FBgn0003447 | X:7858057   |
| FBgn0000210                                                                                | X:1506341   | FBgn0000448 | 2R:6115459  | FBgn0003890 | 3R:23814090 | FBgn0003447 | X:7863738   |
| FBgn0000210                                                                                | X:1506374   | FBgn0000448 | 2R:6120897  | FBgn0010039 | 3R:8198790  | FBgn0003870 | 3R:27539591 |
| FBgn0000210                                                                                | X:1507690   | FBgn0000448 | 2R:6120907  | FBgn0014427 | 3R:25026174 | FBgn0003870 | 3R:27550731 |
| FBgn0000210                                                                                | X:1516765   | FBgn0000448 | 2R:6124854  | FBgn0029853 | X:6155202   | FBgn0003870 | 3R:27551503 |
| FBgn0000546                                                                                | 2R:2019347  | FBgn0000566 | 2R:14515399 | FBgn0030993 | X:19082068  | FBgn0003870 | 3R:27552124 |
| FBgn0000546                                                                                | 2R:2019428  | FBgn0001168 | 3L:8668859  | FBgn0031220 | 2L:120743   | FBgn0004237 | 3R:9486242  |
| FBgn0000546                                                                                | 2R:2044635  | FBgn0001168 | 3L:8669055  | FBgn0031220 | 2L:121752   | FBgn0004449 | 3L:22400964 |
| FBgn0000546                                                                                | 2R:2056593  | FBgn0001226 | 3L:9377163  | FBgn0031220 | 2L:121975   | FBgn0004456 | X:13151205  |
| FBgn0000565                                                                                | 3L:15504152 | FBgn0002526 | 3L:6211123  | FBgn0031717 | 2L:5547086  | FBgn0004456 | X:13152524  |
| FBgn0000565                                                                                | 3L:15504663 | FBgn0004606 | 3R:26591648 | FBgn0031717 | 2L:5547203  | FBgn0004838 | 2L:6920704  |
| FBgn0000565                                                                                | 3L:15504989 | FBgn0004606 | 3R:26608980 | FBgn0031717 | 2L:5547290  | FBgn0004838 | 2L:6920966  |
| FBgn0000567                                                                                | 3L:17569421 | FBgn0005612 | 2R:19866744 | FBgn0031988 | 2L:8127024  | FBgn0004838 | 2L:6921260  |
| FBgn0000567                                                                                | 3L:17569727 | FBgn0005612 | 2R:19867418 | FBgn0031992 | 2L:8162390  | FBgn0004838 | 2L:6921639  |
| FBgn0000567                                                                                | 3L:17612426 | FBgn0010300 | 2L:19133816 | FBgn0036194 | 3L:11689599 | FBgn0010382 | 2L:15731781 |
| FBgn0000568                                                                                | 3L:17954915 | FBgn0010300 | 2L:19158540 | FBgn0036194 | 3L:11690064 | FBgn0010382 | 2L:15746610 |
| FBgn0000568                                                                                | 3L:17964540 | FBgn0010395 | 2L:21053033 | FBgn0037206 | 3L:22903591 | FBgn0010382 | 2L:15748156 |
| FBgn0000568                                                                                | 3L:17992922 | FBgn0011766 | 3R:17458745 | FBgn0037206 | 3L:22903933 | FBgn0010909 | 3L:2586255  |
| FBgn0000568                                                                                | 3L:18052699 | FBgn0011766 | 3R:17463828 | FBgn0038110 | 3R:8837011  | FBgn0010909 | 3L:2586541  |
| FBgn0000568                                                                                | 3L:18054554 | FBgn0011766 | 3R:17486128 | FBgn0038516 | 3R:13360537 | FBgn0013772 | 2R:10776515 |
| FBgn0000568                                                                                | 3L:18057797 | FBgn0011785 | 3R:20144741 | FBgn0038516 | 3R:13360655 | FBgn0015778 | 3R:9472726  |
| FBgn0001257                                                                                | 3L:4225951  | FBgn0013984 | 3R:17415914 | FBgn0038516 | 3R:13361409 | FBgn0015778 | 3R:9474539  |
| FBgn0001257                                                                                | 3L:4227303  | FBgn0013984 | 3R:17417844 | FBgn0039129 | 3R:19759253 | FBgn0023407 | 2L:13547772 |
| FBgn0001257                                                                                | 3L:4236148  | FBgn0013984 | 3R:17444759 | FBgn0039130 | 3R:19759637 | FBgn0023407 | 2L:13549329 |
| FBgn0004865                                                                                | 3L:21219709 | FBgn0013984 | 3R:17445044 | FBgn0039130 | 3R:19759718 | FBgn0025574 | 3R:19715284 |
| FBgn0004865                                                                                | 3L:21220019 | FBgn0014002 | 3L:15134589 | FBgn0051363 | 3R:7417967  | FBgn0025574 | 3R:19715753 |
| FBgn0004865                                                                                | 3L:21233447 | FBgn0014002 | 3L:15135693 | FBgn0051363 | 3R:7430474  | FBgn0025574 | 3R:19715798 |
| FBgn0014469                                                                                | 2R:4332217  | FBgn0014037 | 3L:19902511 | FBgn0051363 | 3R:7445629  | FBgn0026084 | X:4000148   |
| FBgn0016076                                                                                | 2L:5299647  | FBgn0020309 | 2L:11808973 |             |             | FBgn0026084 | X:4000868   |
| FBgn0016076                                                                                | 2L:5305708  | FBgn0020309 | 2L:11809434 |             |             | FBgn0026084 | X:4002982   |
| FBgn0016076                                                                                | 2L:5305722  | FBgn0020386 | 3L:129450   |             |             | FBgn0027660 | 3L:17396835 |
| FBgn0020445                                                                                | 2L:3338448  | FBgn0020386 | 3L:131812   |             |             | FBgn0027660 | 3L:17399622 |
| FBgn0020445                                                                                | 2L:3355001  | FBgn0020386 | 3L:132733   |             |             | FBgn0027660 | 3L:17408912 |
| FBgn0027578                                                                                | 3R:24709415 | FBgn0020386 | 3L:141090   |             |             | FBgn0027660 | 3L:17414615 |
| FBgn0031913                                                                                | 2L:7433517  | FBgn0020386 | 3L:141096   |             |             | FBgn0029903 | X:6697720   |
| FBgn0032482                                                                                | 2L:13203768 | FBgn0020386 | 3L:141321   |             |             | FBgn0029903 | X:6697737   |
| FBgn0032482                                                                                | 2L:13209266 | FBgn0020389 | 3L:19838393 |             |             | FBgn0029903 | X:6697930   |
| FBgn0034045                                                                                | 2R:11734862 | FBgn0020389 | 3L:19840409 |             |             | FBgn0029903 | X:6699018   |
| FBgn0034045                                                                                | 2R:11734866 | FBgn0020389 | 3L:19841265 |             |             | FBgn0029903 | X:6699161   |
| FBgn0035173                                                                                | 3L:882014   | FBgn0023215 | X:3565834   |             |             | FBgn0029903 | X:6699418   |
| FBgn0036956                                                                                | 3L:20224769 | FBgn0023215 | X:3582270   |             |             | FBgn0030797 | X:16722176  |
| FBgn0038074                                                                                | 3R:8500332  | FBgn0023215 | X:3582288   |             |             | FBgn0030797 | X:1672217   |
| FBgn0038981                                                                                | 3R:18354384 | FBgn0023215 | X:3583398   |             |             | FBgn0030797 | X:16729108  |
| FBgn0039613                                                                                | 3R:24706525 | FBgn0024734 | 2L:16251789 |             |             | FBgn0030797 | X:16729548  |
| FBgn0050203                                                                                | 2R:8198194  | FBgn0024734 | 2L:16256156 |             |             | FBgn0031489 | 2L:3018094  |
| FBgn0262867                                                                                | 2R:2083513  | FBgn0024734 | 2L:16257607 |             |             | FBgn0031489 | 2L:3018309  |
| FBgn0262867                                                                                | 2R:2083733  | FBgn0024921 | 3L:6186580  |             |             | FBgn0032350 | 2L:11155717 |
| FBgn0262867                                                                                | 2R:2083868  | FBgn0024921 | 3L:6186846  |             |             | FBgn0033051 | 2R:1910712  |
|                                                                                            |             | FBgn0025390 | X:1512189   |             |             | FBgn0034180 | 2R:12903392 |
|                                                                                            |             | FBgn0025693 | 2R:1670361  |             |             | FBgn0035282 | 3L:1855310  |
|                                                                                            |             | FBgn0026160 | 3L:10850989 |             |             | FBgn0035282 | 3L:1855592  |
|                                                                                            |             | FBgn0026160 | 3L:10851504 |             |             | FBgn0035338 | 3L:2379062  |
|                                                                                            |             | FBgn0026160 | 3L:10862928 |             |             | FBgn0035338 | 3L:2388078  |
|                                                                                            |             | FBgn0026263 | 3L:8049476  |             |             | FBgn0035338 | 3L:2400509  |
|                                                                                            |             | FBgn0026263 | 3L:8051814  |             |             | FBgn0035424 | 3L:3224838  |
|                                                                                            |             | FBgn0026404 | 3L:9961579  |             |             | FBgn0035424 | 3L:3226053  |
|                                                                                            |             | FBgn0027561 | 2R:5019307  |             |             | FBgn0035526 | 3L:4283851  |
|                                                                                            |             | FBgn0027561 | 2R:5019325  |             |             | FBgn0035772 | 3L:7361291  |
|                                                                                            |             | FBgn0027561 | 2R:5019487  |             |             | FBgn0035772 | 3L:7362361  |
|                                                                                            |             | FBgn0027865 | 3R:21707163 |             |             | FBgn0035904 | 3L:8511985  |
|                                                                                            |             | FBgn0029924 | X:6863950   |             |             | FBgn0036007 | 3L:9490467  |
|                                                                                            |             | FBgn0031745 | 2L:5879482  |             |             | FBgn0036007 | 3L:9498429  |

| Table S6, continued |     |             |             |         |     |             |             |
|---------------------|-----|-------------|-------------|---------|-----|-------------|-------------|
| 1 h                 |     | 3 h         |             | 6 h     |     | 12 h        |             |
| Gene ID             | TSS | Gene ID     | TSS         | Gene ID | TSS | Gene ID     | TSS         |
|                     |     | FBgn0031897 | 2L:7220030  |         |     | FBgn0036534 | 3L:15817305 |
|                     |     | FBgn0033310 | 2R:4487938  |         |     | FBgn0036534 | 3L:15819524 |
|                     |     | FBgn0033476 | 2R:5936124  |         |     | FBgn0037636 | 3R:4646379  |
|                     |     | FBgn0033638 | 2R:7520018  |         |     | FBgn0037636 | 3R:4646387  |
|                     |     | FBgn0033638 | 2R:7520076  |         |     | FBgn0040091 | 2R:18531421 |
|                     |     | FBgn0033638 | 2R:7528419  |         |     | FBgn0041092 | 2L:9166778  |
|                     |     | FBgn0033999 | 2R:11103192 |         |     | FBgn0041092 | 2L:9176358  |
|                     |     | FBgn0034368 | 2R:14519404 |         |     | FBgn0051122 | 3R:14235583 |
|                     |     | FBgn0034647 | 2R:17549750 |         |     | FBgn0051122 | 3R:14238597 |
|                     |     | FBgn0035558 | 3L:4542051  |         |     | FBgn0051462 | 3R:4213925  |
|                     |     | FBgn0035558 | 3L:4542120  |         |     | FBgn0052594 | X:14918467  |
|                     |     | FBgn0035558 | 3L:4550689  |         |     | FBgn0052654 | X:12490080  |
|                     |     | FBgn0035693 | 3L:6193573  |         |     | FBgn0052654 | X:12490709  |
|                     |     | FBgn0037007 | 3L:20510405 |         |     | FBgn0052654 | X:12490983  |
|                     |     | FBgn0037007 | 3L:20512494 |         |     | FBgn0053208 | 3R:5847198  |
|                     |     | FBgn0037010 | 3L:20519275 |         |     | FBgn0053208 | 3R:5847400  |
|                     |     | FBgn0038071 | 3R:8473782  |         |     | FBgn0053208 | 3R:5847573  |
|                     |     | FBgn0038535 | 3R:13504426 |         |     | FBgn0053208 | 3R:5850873  |
|                     |     | FBgn0038535 | 3R:13505010 |         |     | FBgn0053208 | 3R:5868544  |
|                     |     | FBgn0038535 | 3R:13507966 |         |     | FBgn0053208 | 3R:5868618  |
|                     |     | FBgn0038535 | 3R:13508235 |         |     | FBgn0064123 | X:20964871  |
|                     |     | FBgn0039612 | 3R:24705964 |         |     | FBgn0085436 | 2R:5465516  |
|                     |     | FBgn0039972 | 2L:22311931 |         |     | FBgn0085436 | 2R:5466513  |
|                     |     | FBgn0039972 | 2L:22311954 |         |     | FBgn0086686 | 3R:10480913 |
|                     |     | FBgn0039972 | 2L:22354355 |         |     | FBgn0086686 | 3R:10481437 |
|                     |     | FBgn0040398 | X:945557    |         |     | FBgn0262735 | X:10700890  |
|                     |     | FBgn0040493 | 3R:8787358  |         |     | FBgn0262735 | X:10708127  |
|                     |     | FBgn0040493 | 3R:8793101  |         |     | FBgn0262735 | X:10709658  |
|                     |     | FBgn0040493 | 3R:8793435  |         |     | FBgn0262735 | X:10715745  |
|                     |     | FBgn0041182 | 2L:7701586  |         |     | FBgn0262735 | X:10715818  |
|                     |     | FBgn0043884 | 3R:20056284 |         |     | FBgn0262735 | X:10716816  |
|                     |     | FBgn0051324 | 3R:21932590 |         |     | FBgn0262937 | 3L:1295913  |
|                     |     | FBgn0051324 | 3R:21954526 |         |     | FBgn0262975 | 3R:19014852 |
|                     |     | FBgn0052218 | 3L:19889492 |         |     | FBgn0262975 | 3R:19015003 |
|                     |     | FBgn0052479 | 3L:871899   |         |     | FBgn0262975 | 3R:19016142 |
|                     |     | FBgn0052479 | 3L:872911   |         |     | FBgn0262975 | 3R:19016877 |
|                     |     | FBgn0052479 | 3L:888018   |         |     | FBgn0262975 | 3R:19026373 |
|                     |     | FBgn0052486 | 3L:3070840  |         |     | FBgn0262975 | 3R:19040280 |
|                     |     | FBgn0052699 | X:9465342   |         |     | FBgn0262975 | 3R:19047684 |
|                     |     | FBgn0052702 | X:9474009   |         |     | FBgn0262975 | 3R:19052431 |
|                     |     | FBgn0085370 | 2L:18563173 |         |     | FBgn0263416 | 3R:4303316  |
|                     |     | FBgn0085370 | 2L:18571649 |         |     |             |             |
|                     |     | FBgn0085443 | X:10387770  |         |     |             |             |
|                     |     | FBgn0085443 | X:10404676  |         |     |             |             |
|                     |     | FBgn0085443 | X:10440788  |         |     |             |             |
|                     |     | FBgn0085443 | X:10449493  |         |     |             |             |
|                     |     | FBgn0085443 | X:10479456  |         |     |             |             |
|                     |     | FBgn0086902 | 2L:221963   |         |     |             |             |
|                     |     | FBgn0086902 | 2L:250824   |         |     |             |             |
|                     |     | FBgn0243514 | 3R:22925402 |         |     |             |             |
|                     |     | FBgn0259984 | 2L:13550141 |         |     |             |             |
|                     |     | FBgn0259984 | 2L:13550164 |         |     |             |             |
|                     |     | FBgn0260486 | 2L:7496308  |         |     |             |             |
|                     |     | FBgn0260794 | 3R:627658   |         |     |             |             |
|                     |     | FBgn0260794 | 3R:637784   |         |     |             |             |
|                     |     | FBgn0260794 | 3R:637789   |         |     |             |             |
|                     |     | FBgn0261239 | 2L:21237250 |         |     |             |             |
|                     |     | FBgn0261258 | 3L:21375601 |         |     |             |             |
|                     |     | FBgn0261618 | 3R:24151964 |         |     |             |             |
|                     |     | FBgn0261618 | 3R:24151987 |         |     |             |             |
|                     |     | FBgn0261618 | 3R:24154006 |         |     |             |             |
|                     |     | FBgn0261618 | 3R:24156941 |         |     |             |             |
|                     |     | FBgn0261618 | 3R:24161264 |         |     |             |             |

| Table S6, continued |     |             |             |         |     |         |     |
|---------------------|-----|-------------|-------------|---------|-----|---------|-----|
| 1 h                 |     | 3 h         |             | 6 h     |     | 12 h    |     |
| Gene ID             | TSS | Gene ID     | TSS         | Gene ID | TSS | Gene ID | TSS |
|                     |     | FBgn0261618 | 3R:24162163 |         |     |         |     |
|                     |     | FBgn0261674 | 3L:12783292 |         |     |         |     |
|                     |     | FBgn0261674 | 3L:12784318 |         |     |         |     |
|                     |     | FBgn0261885 | 3R:13544060 |         |     |         |     |
|                     |     | FBgn0262127 | 3R:10549979 |         |     |         |     |
|                     |     | FBgn0262160 | 2L:13060116 |         |     |         |     |
|                     |     | FBgn0262579 | 3L:8056974  |         |     |         |     |
|                     |     | FBgn0262579 | 3L:8064052  |         |     |         |     |
|                     |     | FBgn0262579 | 3L:8067406  |         |     |         |     |
|                     |     | FBgn0262579 | 3L:8070492  |         |     |         |     |
|                     |     | FBgn0262579 | 3L:8089622  |         |     |         |     |
|                     |     | FBgn0262579 | 3L:8094119  |         |     |         |     |
|                     |     | FBgn0264562 | X:1835973   |         |     |         |     |
|                     |     | FBgn0264562 | X:1886333   |         |     |         |     |

**Table S7.** Early gene promoter-EcRE interactions in Kc167 cells

| Gene                  | TSS Coordinates <sup>a</sup> | EcR/Usp binding site <sup>b</sup> | Type of Interaction <sup>c</sup> |
|-----------------------|------------------------------|-----------------------------------|----------------------------------|
| E75A                  | 3L:17992921                  | 3L:17992222-17998221              | Direct                           |
|                       |                              | 3L:18002222-18012221              | Looping                          |
| E75B                  | 3L:17964539                  | 3L:17908222-17922221              | Looping                          |
|                       |                              | 3L:17924222-17928221              | Looping                          |
|                       |                              | 3L:17956222-17976221              | Direct                           |
| E75C                  | 3L: 18052698                 | -                                 | -                                |
| E75D                  | 3L:17954914                  | 3L:17908222-17922221              | Looping                          |
|                       |                              | 3L:17924222-17928221              | Looping                          |
|                       |                              | 3L:17956222-17976221              | Looping                          |
| Broad <sub>Dist</sub> | X:1469181                    | -                                 | -                                |
| Broad <sub>Prox</sub> | X:1506373                    | X:1507262-1515261                 | Looping                          |
| E74A                  | 3L:17612408                  | 3L:17604222-17610221              | Looping                          |
|                       |                              | 3L:17612222-17618221              | Direct                           |
| E74B                  | 3L: 17569726                 | 3L:17568222-17574221              | Direct                           |

<sup>a</sup> Coordinates are based on published reports (1-4). Note that additional TSS annotations have been predicted.

<sup>b</sup> See (5).

<sup>c</sup> Direct, binding site overlaps TSS; Looping, binding site interacts with TSS through a Hi-C loop (6).

**Table S8.** 1 and 3 h ecdysone-activated genes exhibiting multiple EcRE-promoter interactions in Kc167 cells

| Ecdysone response | Gene        | TSS Coordinate | EcRE-promoter interactions |
|-------------------|-------------|----------------|----------------------------|
| 1 h               | CG5958      | 2L:7433516     | 2                          |
|                   | Eip71CD     | 3L:15504151    | 2                          |
|                   |             | 3L:15504662    | 2                          |
|                   | EcR         | 3L:15504988    | 2                          |
|                   |             | 2R:2019346     | 2                          |
|                   | vri         | 2R:2019427     | 2                          |
|                   |             | 2L:5299646     | 2                          |
|                   |             | 2L:5305707     | 2                          |
| 3 h               | brat        | 2L:5305721     | 2                          |
|                   |             | 2L:19133815    | 3                          |
|                   | CG31324     | 2L:19158539    | 2                          |
|                   |             | 3R:21932589    | 2                          |
|                   | CG5059      | 3R:21954525    | 2                          |
|                   |             | 3L:20510404    | 2                          |
|                   | grsm        | 3L:20512493    | 2                          |
|                   |             | 3R:8787357     | 2                          |
|                   |             | 3R:8793100     | 2                          |
|                   | InR         | 3R:8793434     | 2                          |
|                   |             | 3R:17415913    | 2                          |
|                   | kuz         | 3R:17417843    | 2                          |
|                   |             | 2L:13550140    | 2                          |
|                   | Pdi         | 2L:13550163    | 2                          |
|                   |             | 3L:15134588    | 3                          |
|                   | PRL-1       | 3L:15135692    | 3                          |
| 2L:16251788       |             | 2              |                            |
| 2L:16256155       |             | 2              |                            |
| Su(Tpl)           | 2L:16257606 | 2              |                            |
|                   | 3L:19902510 | 2              |                            |
|                   | X:10440787  | 2              |                            |
| spri              | X:10449492  | 2              |                            |
|                   | X:10479455  | 2              |                            |

**Table S9.** EcR binding sites in early genes at the onset of metamorphosis

| Gene  | EcR binding site coordinates <sup>a, b</sup> |                   | EcR Designation <sup>c</sup> | EcRE No. <sup>d</sup> |
|-------|----------------------------------------------|-------------------|------------------------------|-----------------------|
|       | L3                                           | WPP (0-0.5 h APF) |                              |                       |
| E75   | +27410/+27075                                | +28813/+26078     | -                            | 8,9,10                |
|       | -                                            | +25013/+24678     | -                            | -                     |
|       | -                                            | +24413/+22478     | -                            | -                     |
|       | -                                            | +22113/+21078     | -                            | -                     |
|       | -                                            | +18413/+17878     | -                            | -                     |
|       | -                                            | +11613/+9378      | -                            | 15                    |
|       | -                                            | +6013/+5678       | -                            | -                     |
|       | -                                            | +4313/+3678       | -                            | -                     |
|       | -                                            | +213/-622         | A                            | -                     |
|       | -                                            | -1287/-2222       | B                            | 1                     |
|       | -                                            | -5487/-6322       | C                            | -                     |
|       | -                                            | -7687/-8122       | D                            | -                     |
|       | -                                            | -8787/-9622       | E                            | -                     |
|       | -                                            | -10687/-10922     | F                            | -                     |
|       | -                                            | -11687/-12822     | G                            | -                     |
|       | -                                            | -13287/-13922     | H                            | 3                     |
| -     | -16587/-17022                                | I                 | -                            |                       |
| -     | -19287/-19522                                | J                 | -                            |                       |
| -     | -29787/-30122                                | K                 | -                            |                       |
| -     | -37687/-38422                                | L                 | -                            |                       |
| Broad | -                                            | -35262/-34927     | A                            | 1                     |
|       | -                                            | -34262/-32927     | B                            | 2                     |
|       | -                                            | -2362/-1927       | C                            | -                     |
|       | -27362/-27227                                | -                 | -                            | -                     |
|       | -                                            | +4238/+5173       | D                            | 4,5                   |
| -     | +5438/+6473                                  | E                 | -                            |                       |
| E74   | -                                            | -31182/-32917     | -                            | 3,4,5                 |
|       | -                                            | -34382/-35817     | -                            | 6,7,8,9               |
|       | -                                            | -36582/-37017     | -                            | -                     |

<sup>a</sup> Coordinates shown relative to *E75A*, *Broad proximal*, and *E74B* transcription start sites. Only includes intragenic sequences studied in S2 cells (see Figure 2).

<sup>b</sup> Data retrieved from modENCODE, ID 2640 (L3), 2641 (WPP).

<sup>c</sup> See Figures 8-10.

<sup>d</sup> EcREs identified in S2 cells. Number designations are from this study and (7).



## Supplementary References

1. Burtis, K.C., Thummel, C.S., Jones, C.W., Karim, F.D., and Hogness, D.S. (1990) The *Drosophila* 74EF early puff contains *E74*, a complex ecdysone-inducible gene that encodes two ets-related proteins. *Cell*, **61**, 85–99.
2. Feigl, G., Gram, M., and Pongs, O. (1989) A member of the steroid hormone receptor gene family is expressed in the 20-OH-ecdysone inducible puff 75B in *Drosophila melanogaster*. *Nucleic Acids Res.*, **17**, 7167–7178.
3. Dubrovskaya, V.A., Berger, E.M., and Dubrovsky, E.B. (2004) Juvenile hormone regulation of the *E75* nuclear receptor is conserved in Diptera and Lepidoptera. *Gene*, **340**, 171–177.
4. Johnston, D.M., Sedkov, Y., Petruk, S., Riley, K.M., Fujioka, M., Jaynes, J.B., and Mazo, A. (2011) Ecdysone- and NO-mediated gene regulation by competing EcR/Usp and *E75A* nuclear receptors during *Drosophila* development. *Mol. Cell*, **44**, 51–61.
5. Gauhar, Z., Sun, L.V., Hua, S., Mason, C.E., Fuchs, F., Li, T.-R., Boutros, M., and White, K.P. (2009) Genomic mapping of binding regions for the Ecdysone receptor protein complex. *Genome Res.*, **19**, 1006–1013.
6. Hou, C., Li, L., Qin, Z.S., and Corces, V.G. (2012) Gene Density, Transcription, and Insulators Contribute to the Partition of the *Drosophila* Genome into Physical Domains. *Mol. Cell*, **48**, 471–484.
7. Bernardo, T.J., Dubrovskaya, V.A., Jannat, H., Maughan, B., and Dubrovsky, E.B. (2009) Hormonal regulation of the *E75* gene in *Drosophila*: identifying functional regulatory elements through computational and biological analysis. *J. Mol. Biol.*, **387**, 794–808.
